# Supplementary material for: Ligand recognition and gating mechanism through three ligand-binding sites of human TRPM2 channel
Source: eLife journal article supplement (doi:10.7554/elife.50175), 2019-09-12

**Figure 1 - figure supplement 4**

**a**

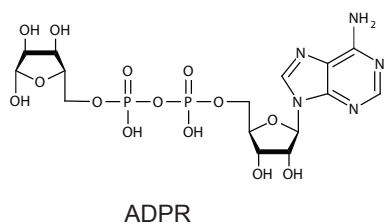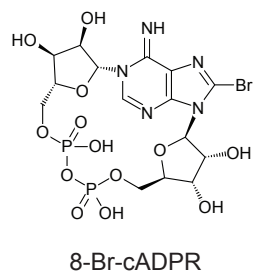

**b**

**ADPR-*hs*TRPM2**

Full map

Half map 1

Half map 2

ADPR1

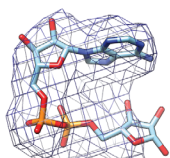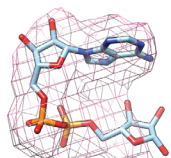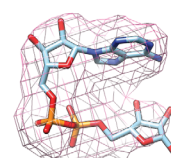

ADPR2

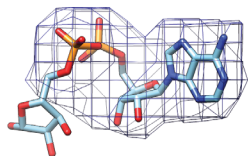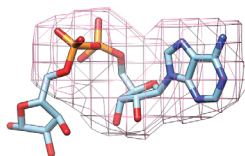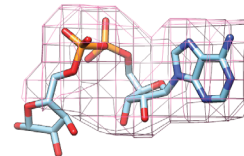

**ADPR/ $\text{Ca}^{2+}$ -*hs*TRPM2**

ADPR1

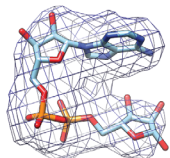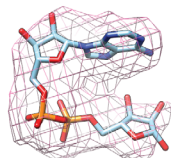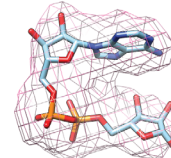

ADPR2

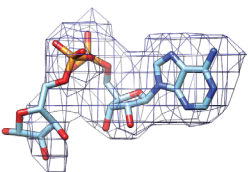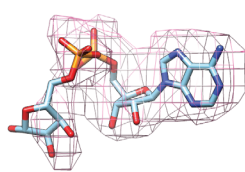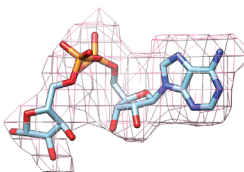

**8-Br-cADPR/ $\text{Ca}^{2+}$ -*hs*TRPM2**

8-Br-cADPR

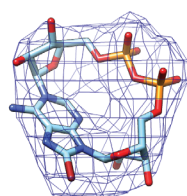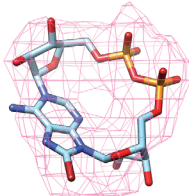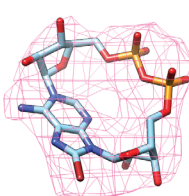

Supplement: supp [file elife_poa_e50175_Figure_1_figure_supplement_4.pdf › elife_poa_e50175_Figure_1_figure_supplement_4.pdf]
