# Supplementary figures and images for: Ligand recognition and gating mechanism through three ligand-binding sites of human TRPM2 channel
Source: eLife journal article supplement (doi:10.7554/elife.50175), 2019-09-12

Figure1 - figure supplement 1

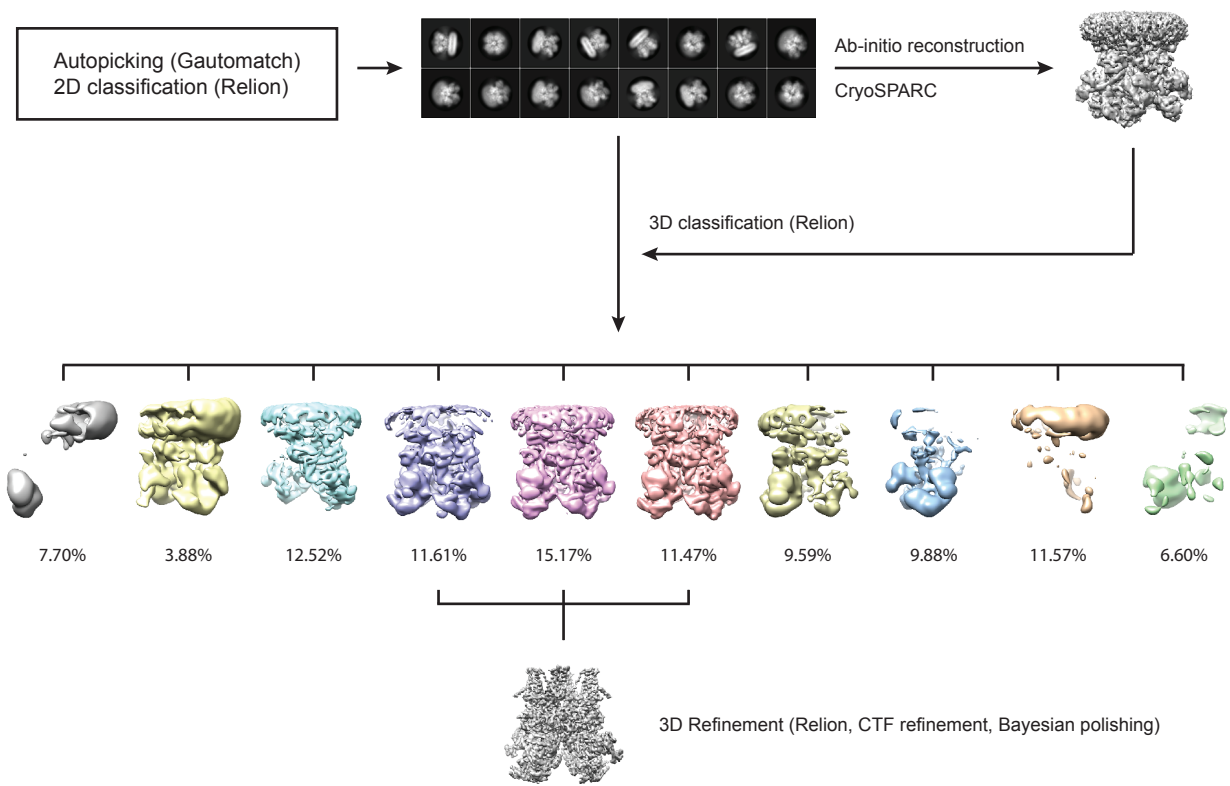

Supplement: supp [file elife_poa_e50175_Figure_1_figure_supplement_1.pdf › elife_poa_e50175_Figure_1_figure_supplement_1.pdf]

**Figure 1 - figure supplement 2**

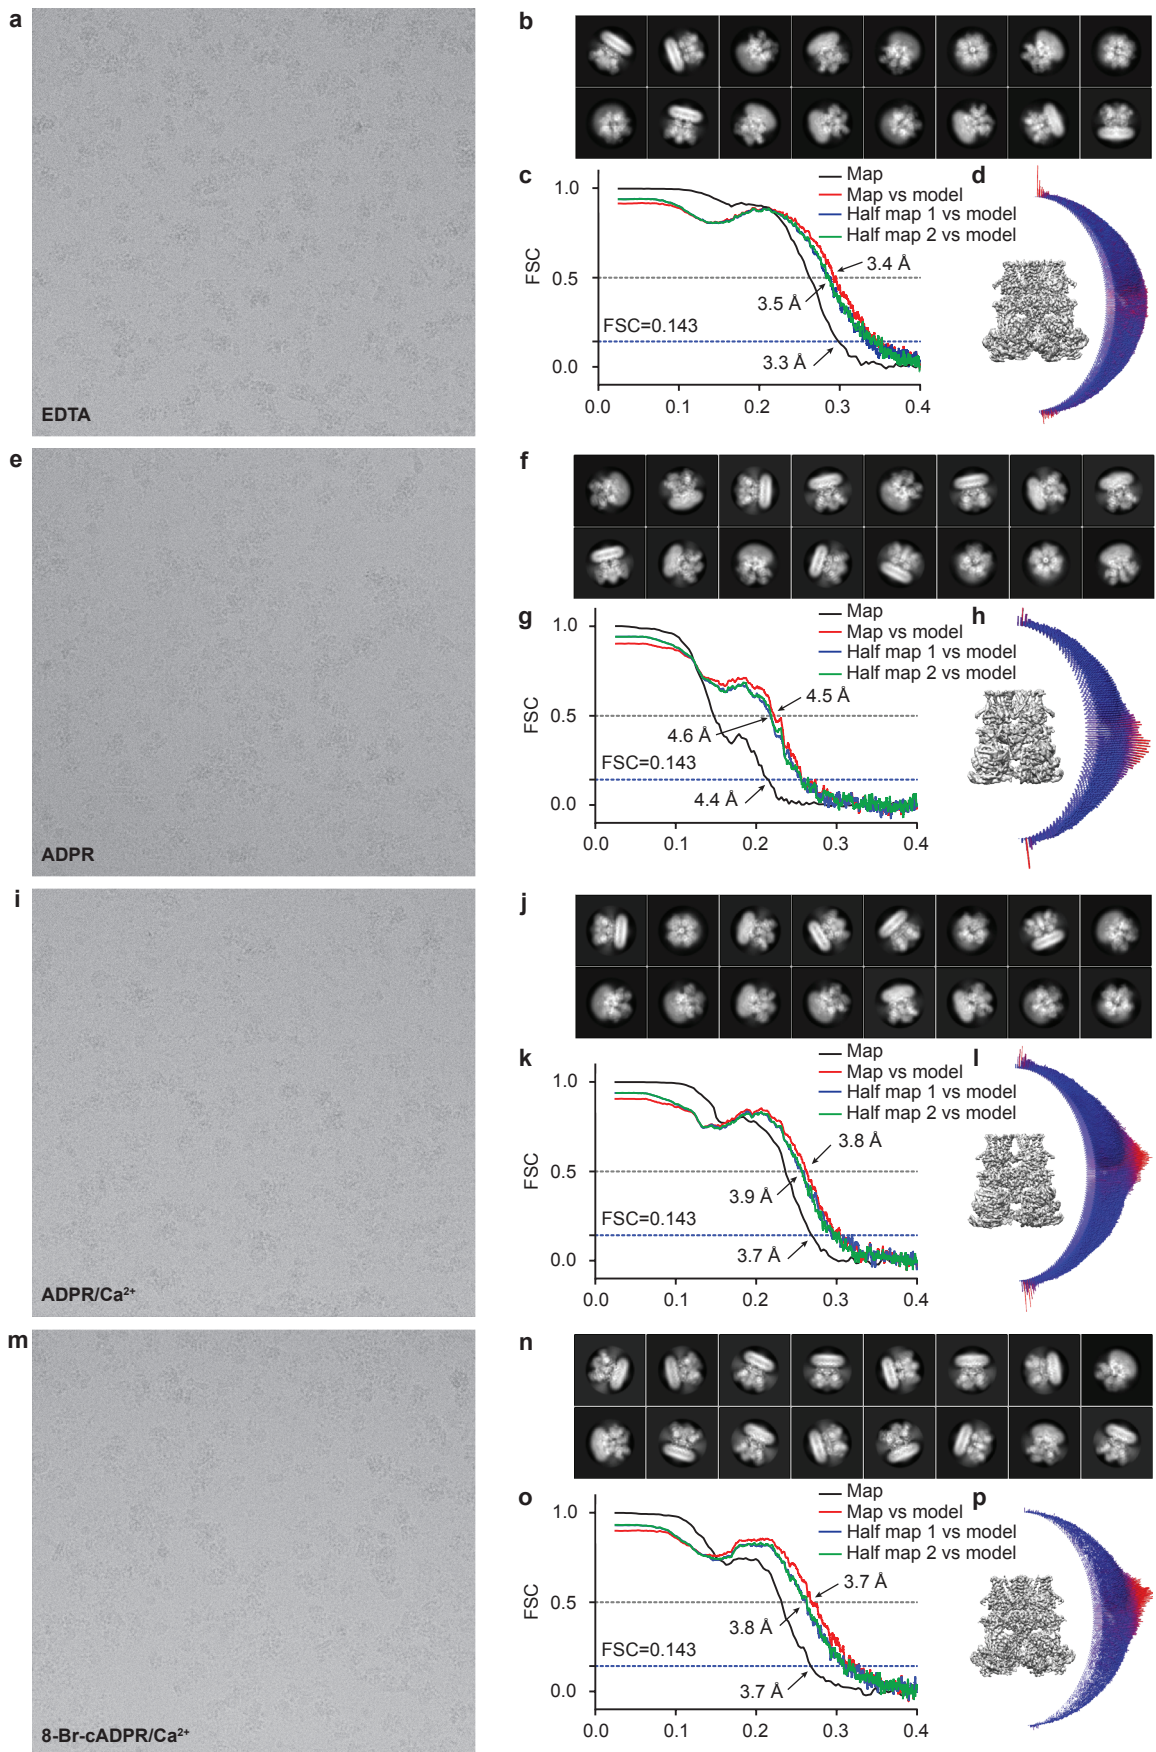

Supplement: supp [file elife_poa_e50175_Figure_1_figure_supplement_2.pdf › elife_poa_e50175_Figure_1_figure_supplement_2.pdf]

Figure 1 - figure supplement 3

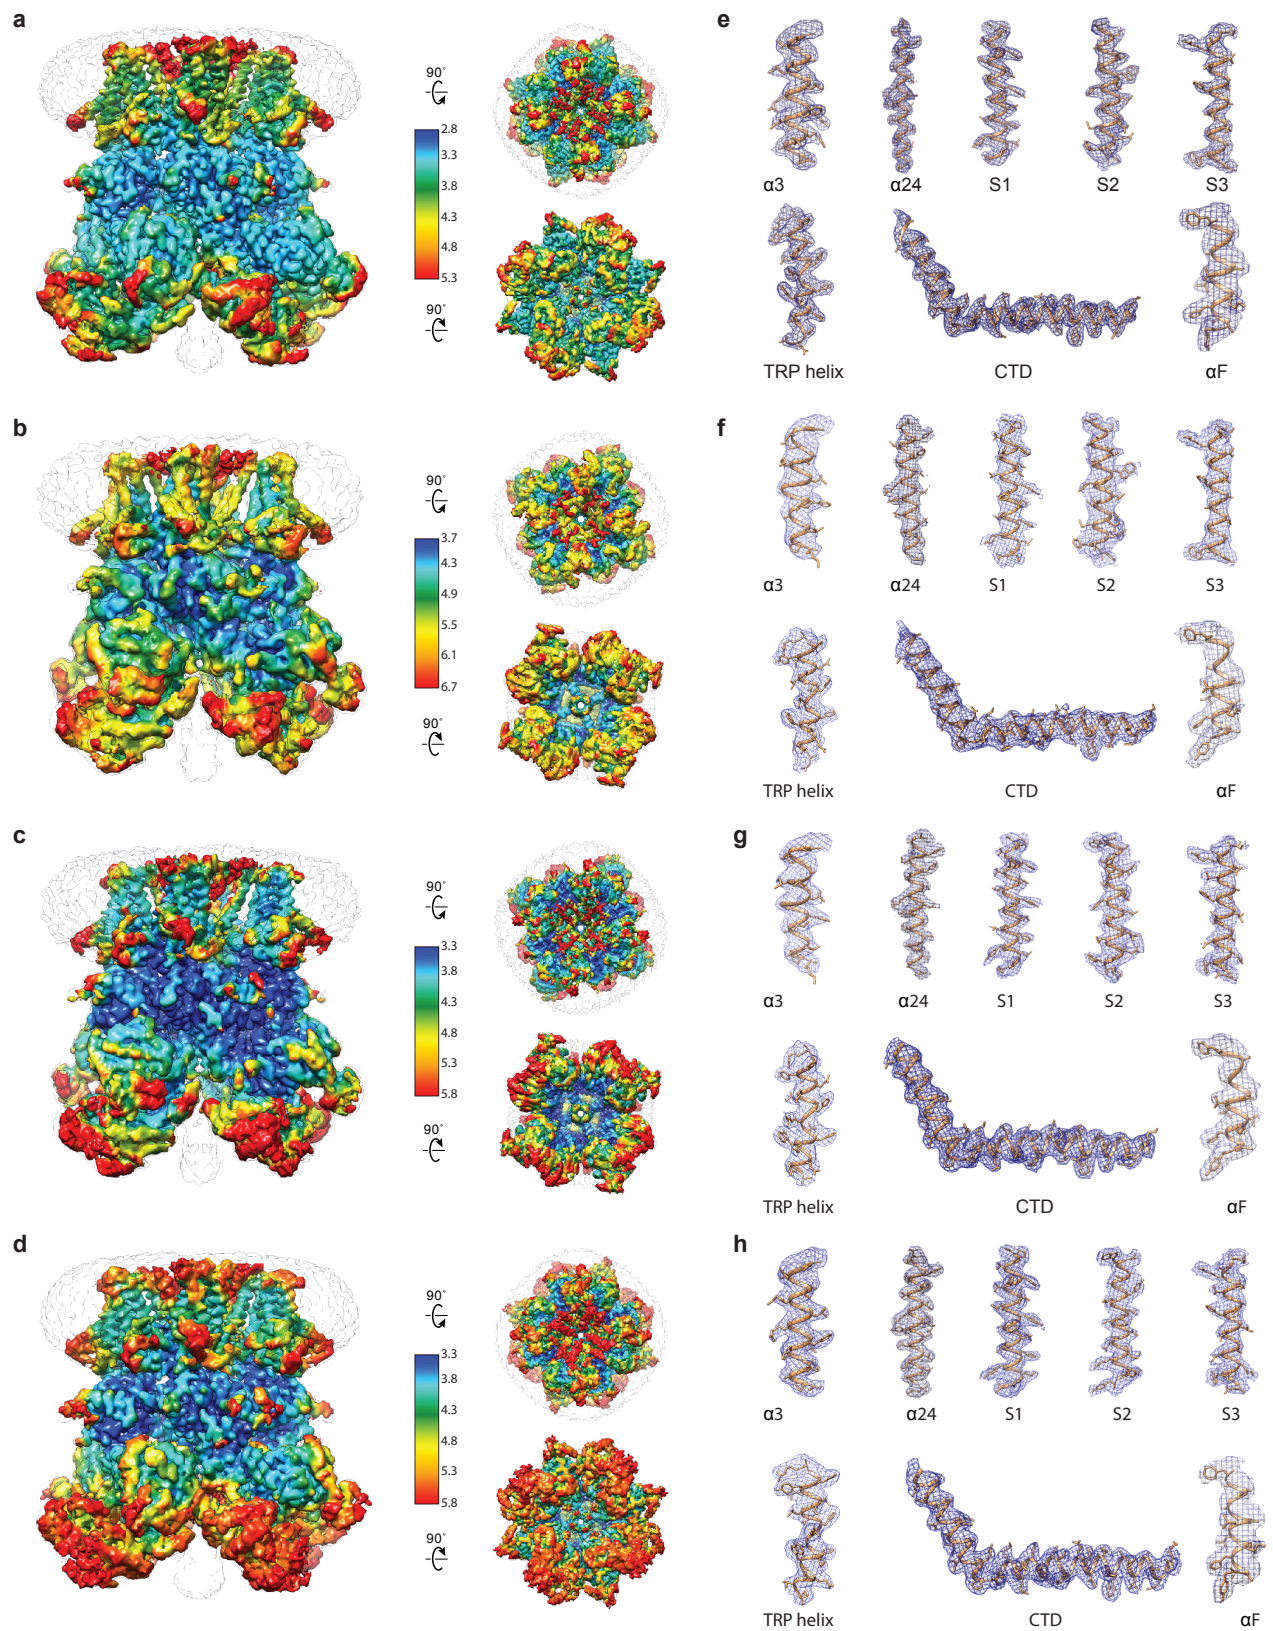

Supplement: supp [file elife_poa_e50175_Figure_1_figure_supplement_3.pdf › elife_poa_e50175_Figure_1_figure_supplement_3.pdf]

**Figure 1 - figure supplement 5**

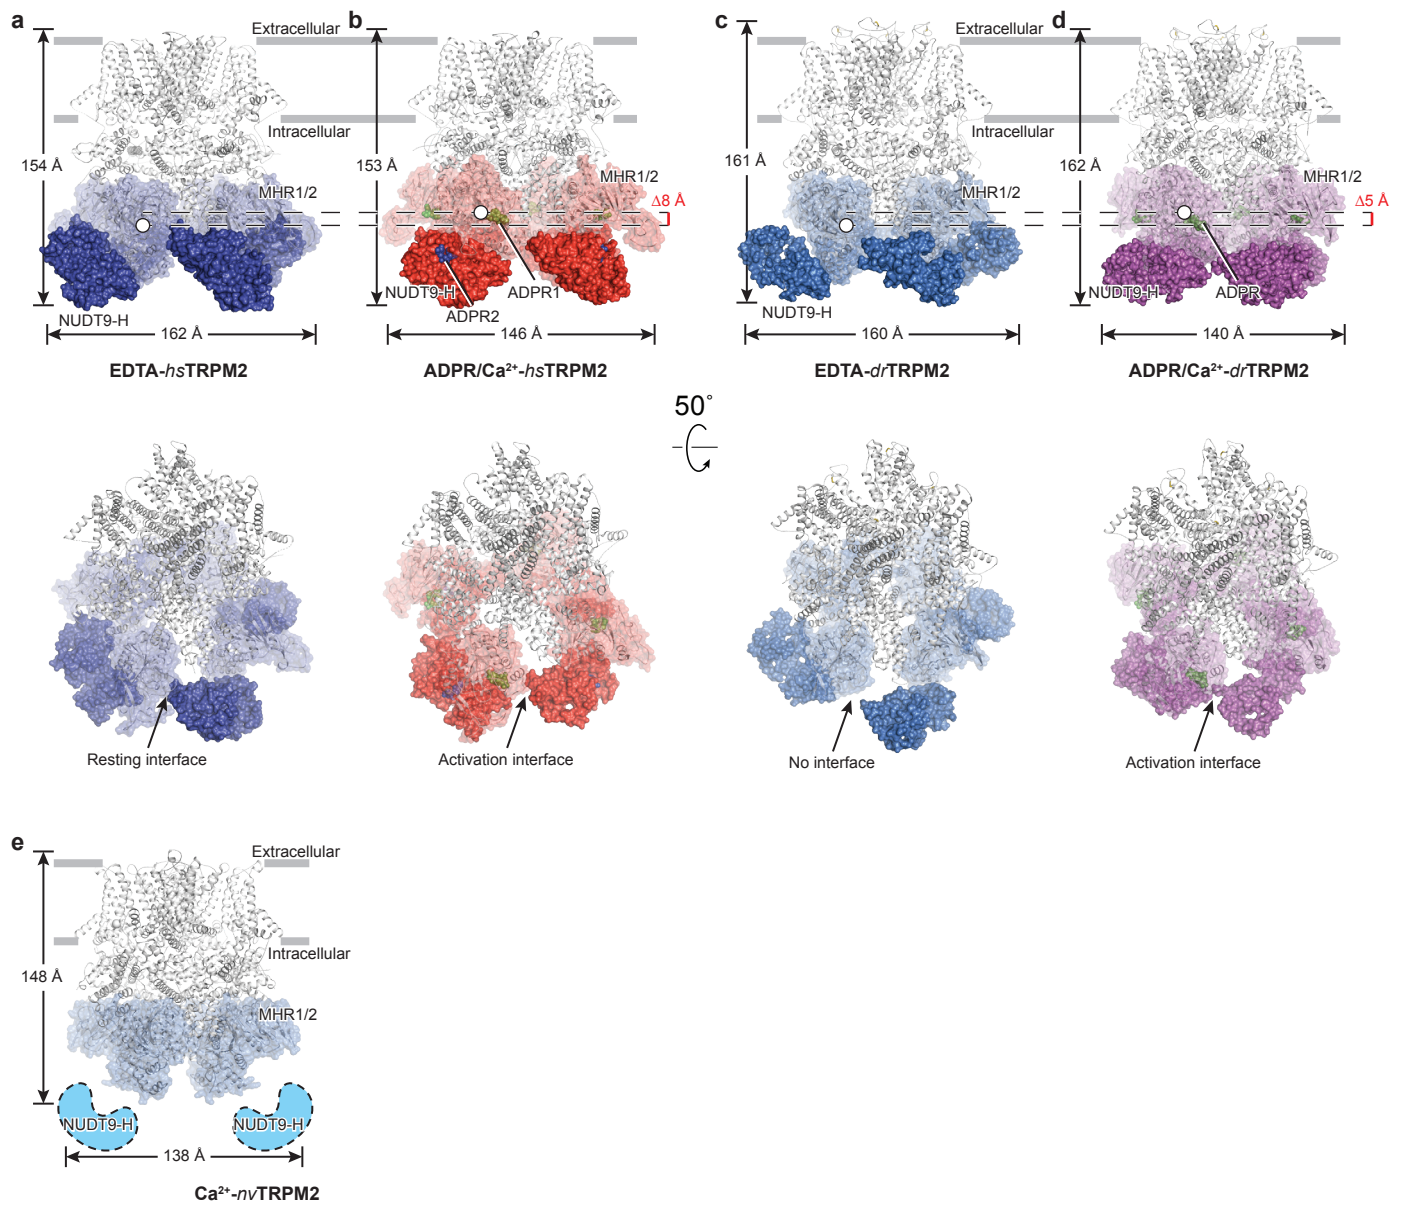

Supplement: supp [file elife_poa_e50175_Figure_1_figure_supplement_5.pdf › elife_poa_e50175_Figure_1_figure_supplement_5.pdf]

### Figure 2 - figure supplement 1

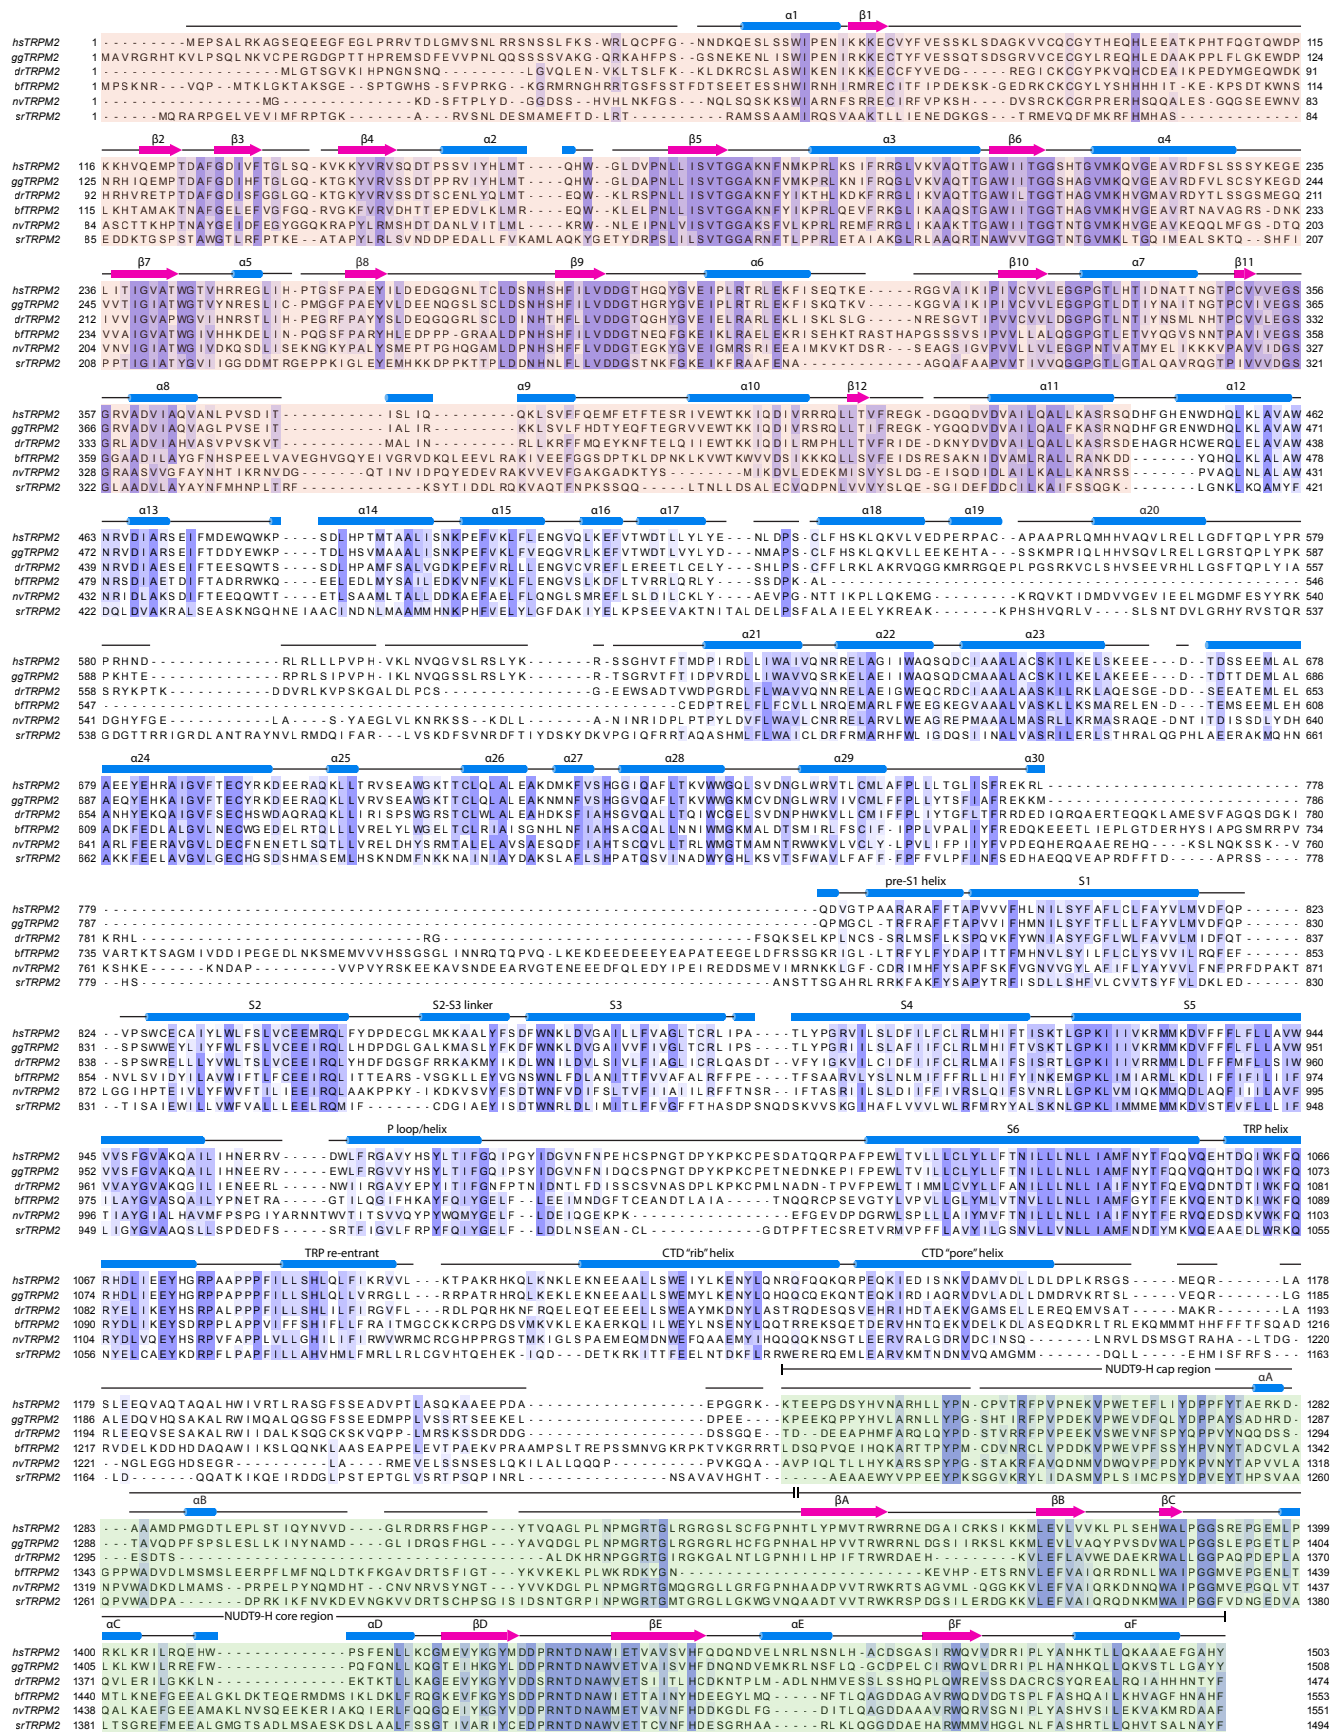

Supplement: supp [file elife_poa_e50175_Figure_2_figure_supplement_1.pdf › elife_poa_e50175_Figure_2_figure_supplement_1.pdf]

Figure 4 - figure supplement 1

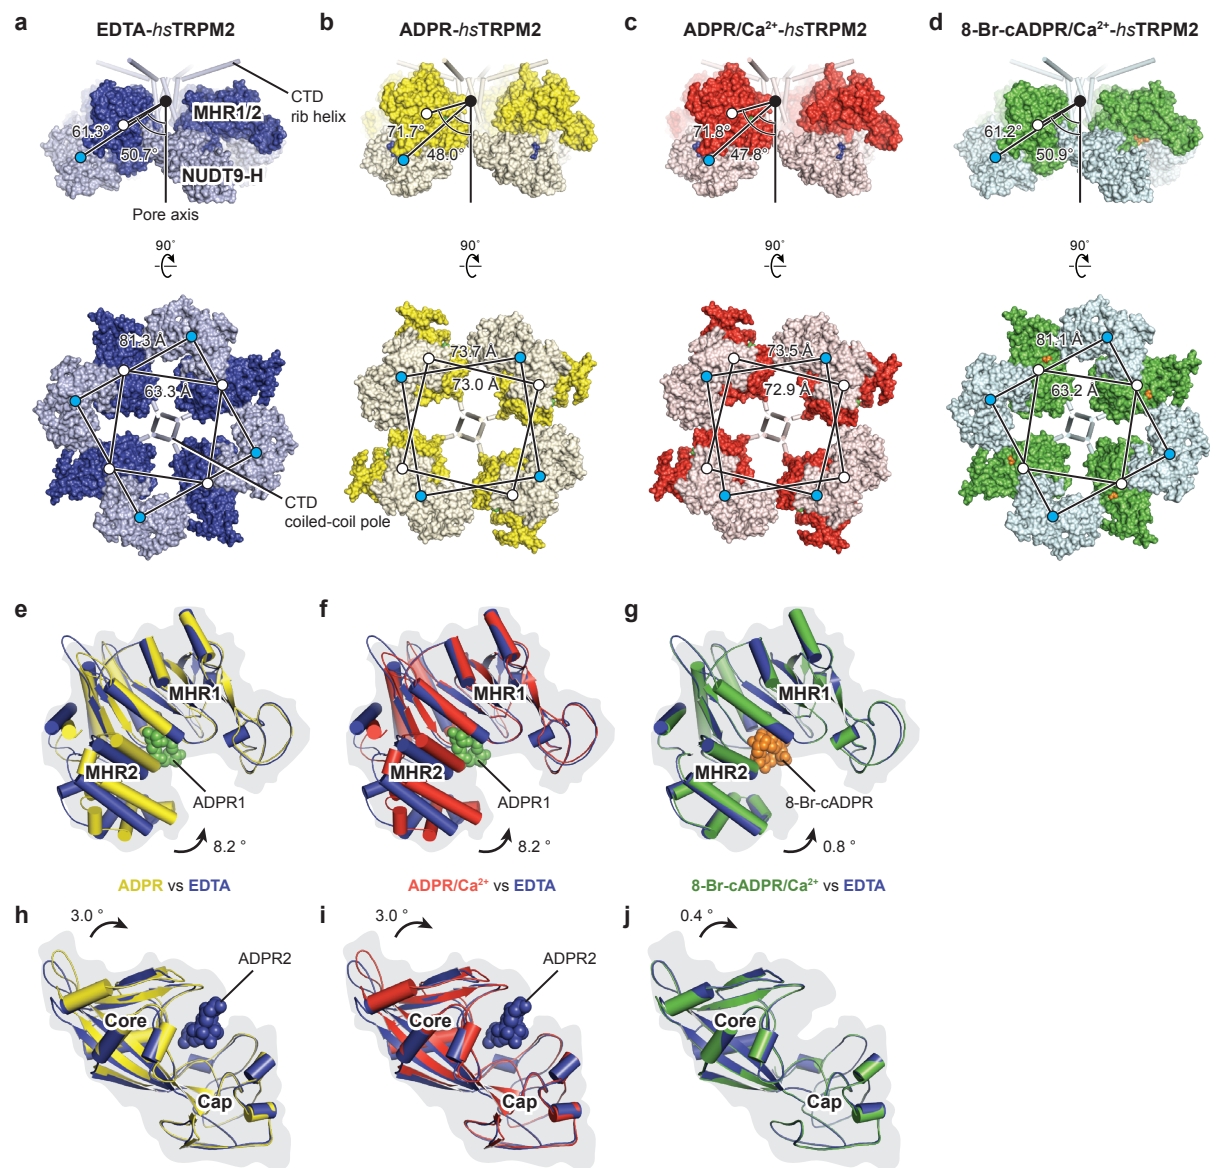

Supplement: supp [file elife_poa_e50175_Figure_4_figure_supplement_1.pdf › elife_poa_e50175_Figure_4_figure_supplement_1.pdf]

Figure 5 - figure supplement 1

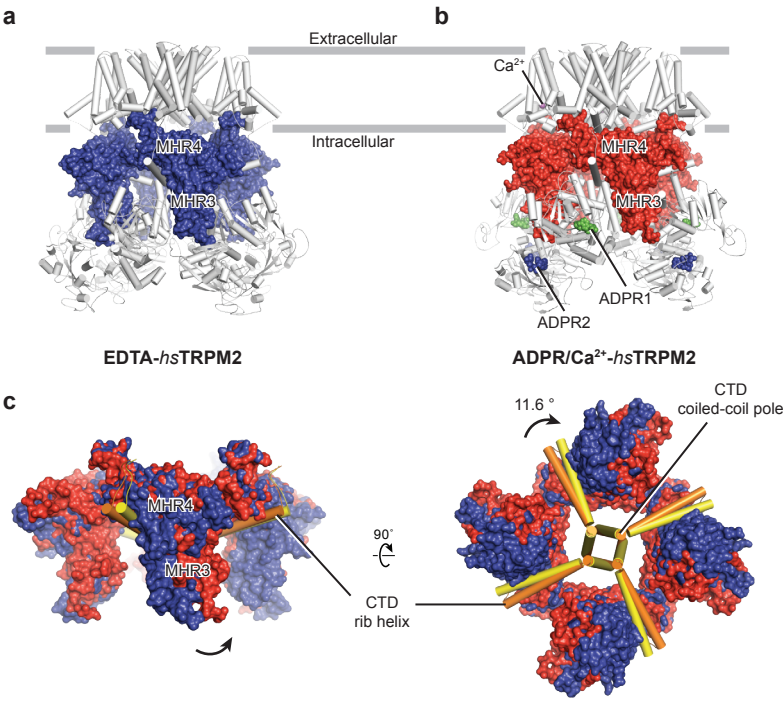

Supplement: supp [file elife_poa_e50175_Figure_5_figure_supplement_1.pdf › elife_poa_e50175_Figure_5_figure_supplement_1.pdf]

**Figure 6 - figure supplement 1**

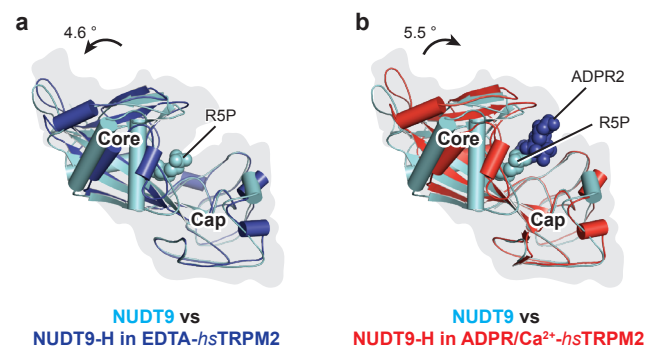

Supplement: supp [file elife_poa_e50175_Figure_6_figure_supplement_1.pdf › elife_poa_e50175_Figure_6_figure_supplement_1.pdf]
